# Supplementary material for: Retrospective Cohort Analysis of Chest Injury Characteristics and Concurrent Injuries in Patients Admitted to Hospital in the Wenchuan and Lushan Earthquakes in Sichuan, China
Source: PLoS One. 2014 May 9;9(5):e97354. doi: 10.1371/journal.pone.0097354 (PMC4016322; doi:10.1371/journal.pone.0097354)
Supplement: Data S1 — Raw data of chest injury characteristics and concurrent injuries in patients admitted to our hospital in the Wenchuan and Lushan earthquakes. (XLS) [file pone.0097354.s001.xls]

## Sheet: Wenchuan Earthquake
Sex	Age（year）	Injury mechanism	Fracture of ribs(yes=1,no=2)	Pulmonary contusion(yes=1,no=2)	Pneumothorax(yes=1,no=2)	Hemothorax(yes=1,no=2)	Hemopneumothorax(yes=1,no=2)	Fracture of sternum(yes=1,no=2)	Diaphragmatic hernia(yes=1,no=2)	Thoracic duct injury(yes=1,no=2)	Traumatic asphyxia(yes=1,no=2)	Mediastinal emphysema(yes=1,no=2)	Mediastinal effusion(yes=1,no=2)	Brain and skull(yes=1,no=2)	Face and neck(yes=1,no=2)	Abdomen(yes=1,no=2)	Spine and spinal cord(yes=1,no=2)	Extremities(yes=1,no=2)	External injuries(yes=1,no=2)	Seismic intensity	CII	ISS	NISS	Respiratory failure(yes=1, no=0)	Death（yes=1,no=2）	Thoracic procedures(yes=1,no=0)
female	60	being buried	2	1	2	2	2	2	2	2	2	2	2	2	2	1	2	1	2		9	34	34	1	1	0
male	19	being buried	1	2	2	2	2	2	2	2	2	2	2	1	2	2	2	2	2		13	34	50	1	1	0
male	64	being buried	2	1	2	2	2	2	2	2	2	2	2	2	2	1	2	1	2		16	34	34	1	1	0
female	64	being accidentally struck	1	1	2	2	2	2	2	2	2	2	2	1	2	2	2	2	2		41	41	57	1	1	0
female	83	being accidentally struck	2	1	2	2	2	2	2	2	2	2	2	2	2	2	2	2	1	VII	57	26	57	1	1	1
male	44	being accidentally struck	1	1	1	2	2	2	2	2	2	2	2	2	2	2	2	2	2		48	16	48	1	1	1
male	51	falling	1	1	2	2	1	2	2	2	2	2	2	1	2	1	2	1	2	VII	41	29	41	1	2	1
female	3	being buried	2	1	1	2	2	2	2	2	2	2	2	1	2	1	2	2	1		20	29	29	1	2	0
female	18	being buried	1	1	2	2	2	2	2	2	2	2	2	2	2	2	2	1	2	VIII	10	25	34	1	2	0
female	26	being buried	2	1	2	2	2	2	2	2	2	2	2	2	2	2	2	1	2		9	25	25	1	2	0
male	78	being accidentally struck	1	1	2	2	1	2	2	2	2	2	2	1	2	1	2	1	2		41	36	48	1	2	1
male	45	being accidentally struck	1	1	2	2	1	2	2	2	2	2	2	1	2	2	2	1	2	IX	34	29	34	1	2	1
male	39	being buried	1	1	2	1	2	2	2	2	2	2	2	2	2	2	2	1	1		41	30	50	1	2	1
female	72	being accidentally struck	2	1	2	2	2	2	2	2	2	2	2	1	2	2	2	1	2		9	27	27	1	2	0
male	55	being accidentally struck	1	1	2	2	2	2	2	2	2	2	2	2	2	2	1	2	2		9	29	33	1	2	0
female	63	being buried	1	2	1	2	2	2	2	2	2	2	2	1	2	2	2	1	1		34	22	27	1	2	0
female	36	being accidentally struck	1	1	2	2	1	2	2	2	2	2	2	2	2	2	1	2	2	IX	34	29	34	1	2	1
male	23	being buried	1	1	2	2	1	2	2	2	2	2	2	1	2	2	1	2	2		27	29	34	1	2	1
female	72	being accidentally struck	1	1	2	2	2	2	2	2	2	2	2	2	2	2	2	1	2	VII	25	29	29	1	2	0
female	70	being accidentally struck	2	1	2	2	2	2	2	2	2	2	2	2	2	2	2	1	2		9	13	13	1	2	1
male	43	being accidentally struck	1	1	2	2	1	2	2	2	2	2	2	2	2	2	1	1	2	IX	41	20	41	1	2	1
female	50	being accidentally struck	1	1	2	2	2	2	2	2	2	2	2	2	2	1	2	2	2		25	32	41	1	2	1
male	74	being accidentally struck	1	1	2	1	2	2	2	2	2	2	2	2	2	2	1	2	2	VIII	38	25	38	1	2	1
female	20	being accidentally struck	1	1	2	1	2	2	2	2	2	2	2	2	2	2	2	1	2		25	25	34	1	2	1
female	68	being accidentally struck	1	1	2	2	2	2	2	2	2	2	2	1	2	2	2	1	2		13	34	34	1	2	1
female	72	being accidentally struck	1	1	2	1	2	2	2	2	2	2	2	2	2	2	1	1	1		45	30	45	1	2	0
female	85	being accidentally struck	1	1	2	2	1	2	2	2	2	2	2	2	2	2	2	1	2		27	14	27	1	2	1
female	61	being accidentally struck	1	1	2	2	2	2	2	2	2	2	2	2	2	2	2	1	2	VIII	25	20	29	1	2	0
male	76	being accidentally struck	1	1	2	2	1	2	2	2	2	2	2	2	2	2	2	2	1	VIII	50	26	50	1	2	1
male	83	falling	1	1	2	2	1	2	2	2	2	2	2	1	2	2	2	1	2	VII	50	45	57	1	2	1
female	25	being accidentally struck	1	1	2	2	1	1	2	2	2	2	2	2	2	2	2	2	2	IX	34	16	34	1	2	1
male	37	being accidentally struck	1	1	2	2	1	2	2	2	2	2	2	2	2	1	1	1	1	VI	29	24	29	1	2	1
male	53	being accidentally struck	2	2	2	2	2	2	1	2	2	2	2	2	2	2	2	1	1	IX	41	16	41	1	2	1
male	51	being buried	1	1	2	2	1	2	2	2	2	2	2	2	2	2	1	1	2		25	24	29	1	2	1
female	83	being accidentally struck	1	1	2	2	2	2	2	2	2	2	2	2	2	2	1	1	2	VIII	25	24	29	1	2	0
male	71	being accidentally struck	1	1	2	2	2	2	2	2	2	2	2	2	2	2	2	1	2		34	20	34	1	2	1
male	69	falling	1	2	2	2	1	2	2	2	2	2	2	1	2	1	2	2	1	IX	18	17	22	1	2	1
female	44	being accidentally struck	1	1	2	2	1	2	2	2	2	2	2	2	2	2	2	2	2	IX	27	9	27	1	2	1
female	6	being accidentally struck	1	2	2	2	2	2	2	2	2	2	2	2	2	2	2	1	1	VIII	1	6	6	0	2	0
male	11	being accidentally struck	1	2	2	2	2	2	2	2	2	2	2	2	2	2	2	1	1	IX	1	9	9	0	2	0
male	11	being accidentally struck	2	1	2	2	1	2	2	2	2	2	2	1	2	2	2	1	1	VIII	13	22	22	0	2	1
male	18	being accidentally struck	1	2	2	2	2	2	2	2	2	2	2	2	2	2	2	2	1		1	2	2	0	2	0
female	9	being buried	1	2	2	2	2	2	2	2	2	2	2	1	2	1	2	2	2	IX	1	33	41	0	2	0
male	12	being buried	1	1	2	2	1	2	2	1	2	2	2	2	2	2	2	1	1	VIII	17	11	17	0	2	1
male	13	being accidentally struck	1	2	1	2	2	2	2	2	2	2	2	2	2	2	2	1	1	IX	5	14	17	0	2	0
female	70	being accidentally struck	1	2	2	2	2	2	2	2	2	2	2	2	2	2	2	1	2		1	5	5	0	2	0
female	40	being accidentally struck	1	1	2	1	2	2	2	2	2	2	2	2	2	2	1	1	1	IX	13	13	13	0	2	1
female	45	being accidentally struck	1	1	1	2	2	2	2	2	2	2	2	2	2	2	1	1	2	VIII	22	17	22	0	2	0
female	61	being buried	1	1	2	2	2	2	2	2	2	2	2	2	1	2	2	1	2	VIII	13	14	17	0	2	0
male	50	being accidentally struck	1	1	2	1	2	2	2	2	2	2	2	2	2	2	1	1	2	IX	22	38	43	0	2	1
female	82	being accidentally struck	1	2	2	2	2	2	2	2	2	2	2	2	2	2	2	1	2	VII	4	13	13	0	2	0
male	60	being accidentally struck	1	1	2	2	2	2	2	2	2	2	2	2	2	2	1	1	2	IX	25	29	34	0	2	0
male	88	being accidentally struck	1	2	2	2	2	2	2	2	2	2	2	1	2	2	2	1	2	VIII	1	14	17	0	2	0
male	78	being accidentally struck	1	1	2	1	2	2	2	2	2	2	2	2	2	2	2	2	2	VIII	20	16	20	0	2	1
female	56	being accidentally struck	1	1	2	1	2	2	2	2	2	2	2	2	2	2	1	1	1	VIII	13	17	17	0	2	1
female	60	being accidentally struck	1	2	2	2	2	2	2	2	2	2	2	2	2	2	2	1	1	VIII	9	19	22	0	2	1
male	68	being accidentally struck	1	1	2	2	1	2	2	2	2	2	2	2	2	2	1	1	2	VII	22	17	22	0	2	0
female	52	being accidentally struck	1	1	2	2	2	2	2	2	2	2	2	2	2	2	1	1	2	IX	9	17	17	0	2	0
female	42	being accidentally struck	1	2	2	1	2	2	2	2	2	2	2	2	2	2	1	1	2	XI	10	17	17	0	2	0
male	86	being accidentally struck	1	2	2	2	2	2	2	2	2	2	2	2	2	2	1	1	2	VIII	5	8	9	0	2	0
female	36	falling	1	1	2	2	1	2	2	2	2	2	2	2	2	2	2	1	1		29	21	29	0	2	0
male	36	being accidentally struck	1	1	2	2	2	2	2	2	2	2	2	2	2	2	1	1	2		24	25	29	0	2	0
female	40	being accidentally struck	1	2	2	2	2	2	2	2	2	2	2	2	2	2	2	1	1	IX	1	6	6	0	2	0
female	78	being accidentally struck	1	1	2	1	2	2	2	2	2	2	2	2	2	2	2	1	1	VII	13	14	17	0	2	1
male	36	being accidentally struck	1	1	2	2	2	2	2	2	2	2	2	1	2	2	1	1	1		13	27	27	0	2	1
female	55	being accidentally struck	1	1	2	2	2	2	2	2	2	2	2	2	2	2	2	1	2	VIII	18	13	22	0	2	0
male	80	being accidentally struck	1	1	2	2	2	2	2	2	2	2	2	2	2	2	1	2	2	IX	17	9	17	0	2	0
female	83	being accidentally struck	1	2	2	1	2	2	2	2	2	2	2	2	2	2	1	2	2		8	8	12	0	2	0
female	55	being buried	1	2	2	2	2	2	2	2	2	2	2	2	2	2	2	1	1		20	26	29	0	2	0
male	65	being accidentally struck	1	1	2	2	1	2	2	2	2	2	2	2	2	2	1	1	2		18	17	22	0	2	1
male	33	being accidentally struck	1	1	2	2	2	2	2	2	2	2	2	1	1	2	1	1	1	XI	17	26	34	0	2	0
male	46	falling	1	1	2	2	2	2	2	2	2	2	2	2	2	2	2	1	2	VII	13	13	17	0	2	0
male	63	being accidentally struck	1	2	2	2	2	2	2	2	2	2	2	2	2	2	2	1	1	XI	4	9	12	0	2	0
female	57	being accidentally struck	1	2	2	2	2	2	2	2	2	2	2	2	2	2	2	1	1	XI	1	6	6	0	2	0
female	15	being accidentally struck	1	2	2	2	2	2	2	2	2	2	2	2	2	2	2	1	2	XI	1	5	12	0	2	0
female	40	being accidentally struck	1	2	2	2	2	2	2	2	2	2	2	2	2	2	2	1	2	IX	9	13	17	0	2	0
male	32	falling	1	2	1	2	2	2	2	2	2	2	2	1	2	2	1	2	1	VIII	5	17	17	0	2	1
female	81	being accidentally struck	1	1	2	2	2	2	2	2	2	2	2	2	2	2	1	1	1		3	17	17	0	2	0
male	34	being accidentally struck	1	2	2	2	2	2	2	2	2	2	2	2	2	2	2	1	1	IX	2	8	12	0	2	0
female	46	falling	1	2	2	2	2	2	2	2	2	2	2	2	2	2	1	1	2		13	17	17	0	2	0
female	63	being accidentally struck	1	1	2	2	1	2	2	2	2	2	2	2	2	2	2	1	2	VIII	34	20	34	0	2	1
male	54	being accidentally struck	1	1	2	1	2	2	2	2	2	2	2	2	2	2	1	1	2		13	13	13	0	2	0
female	87	being accidentally struck	1	1	2	2	2	2	2	2	2	2	2	2	2	2	2	1	2	IX	13	18	22	0	2	0
female	76	falling	2	1	2	2	2	2	2	2	2	2	2	2	2	2	1	1	2	IX	13	17	17	0	2	0
female	27	being accidentally struck	1	2	2	2	2	2	2	2	2	2	2	1	2	2	2	1	1	IX	9	22	22	0	2	0
male	51	falling	1	2	2	2	2	2	2	2	2	2	2	1	1	2	2	1	2	VI	8	17	17	0	2	0
female	44	being accidentally struck	1	2	2	2	2	2	2	2	2	2	2	2	2	2	2	1	2		4	8	12	0	2	0
male	32	falling	1	2	2	2	2	2	2	2	2	2	2	2	2	2	1	2	2	VII	9	13	13	0	2	0
female	38	being buried	1	1	2	2	1	2	2	2	2	2	2	2	2	2	1	1	2	VII	25	24	29	0	2	1
female	68	being accidentally struck	1	2	2	1	2	2	2	2	2	2	2	2	2	2	1	1	2	IX	13	17	17	0	2	1
female	80	being accidentally struck	1	1	2	2	2	2	2	2	2	2	2	2	2	2	2	1	2	VII	18	18	27	0	2	0
female	81	being accidentally struck	1	1	2	2	2	2	2	2	2	2	2	2	2	2	2	1	2	VIII	13	18	22	0	2	0
male	41	being accidentally struck	1	2	2	1	2	2	2	2	2	2	2	2	2	2	1	2	2		4	8	8	0	2	0
male	37	being accidentally struck	1	2	2	2	2	2	2	2	2	2	2	2	2	2	2	1	2	XI	9	18	22	0	2	0
male	56	being accidentally struck	1	1	1	2	2	2	2	2	2	2	2	1	2	2	2	2	2		8	13	17	0	2	1
male	69	being accidentally struck	1	2	2	2	2	2	2	2	2	2	2	2	2	2	2	1	2	XI	9	18	18	0	2	0
male	53	being accidentally struck	1	1	2	2	2	1	2	2	2	2	2	2	2	2	1	1	1	IX	38	33	38	0	2	0
male	80	falling	1	2	2	2	2	2	2	2	2	2	2	2	2	2	2	1	2	X	9	18	18	0	2	0
female	75	being accidentally struck	1	1	2	2	2	2	2	2	2	2	2	2	2	2	1	2	2		38	34	43	0	2	0
female	81	being buried	1	1	2	2	2	2	2	2	2	2	2	1	2	2	2	1	2	VII	13	17	17	0	2	0
male	39	falling	1	2	2	1	2	2	2	2	2	2	2	2	2	2	1	2	2		24	16	24	0	2	0
male	64	being buried	1	1	2	2	2	2	2	2	2	2	2	2	2	2	1	1	1		34	33	38	0	2	0
female	69	being accidentally struck	1	2	2	1	2	2	2	2	2	2	2	1	2	2	2	1	1	IX	13	17	17	0	2	0
male	44	being accidentally struck	1	2	2	2	2	2	2	2	2	2	2	2	2	2	1	2	2	VII	4	8	8	0	2	0
male	35	being accidentally struck	1	1	2	1	2	2	2	2	2	2	2	2	2	2	2	1	2	VII	25	20	29	0	2	1
male	38	being accidentally struck	2	2	2	1	2	2	2	2	2	2	2	2	2	2	2	2	1		1	1	1	0	2	0
female	65	being accidentally struck	2	1	2	2	2	2	2	2	2	2	2	2	2	2	2	2	1		1	1	1	0	2	0
female	80	being accidentally struck	1	2	2	2	2	2	2	2	2	2	2	2	2	2	2	1	2		18	13	22	0	2	0
male	67	being accidentally struck	2	1	2	2	2	2	2	2	2	2	2	2	2	2	2	1	2		9	13	13	0	2	0
female	73	being accidentally struck	1	2	2	1	2	2	2	2	2	2	2	2	2	2	2	1	2	VII	34	29	38	0	2	0
female	82	being accidentally struck	1	1	2	2	2	2	2	2	2	2	2	2	2	2	2	2	2	VII	13	9	13	0	2	0
female	60	being buried 197h	2	1	2	2	2	2	2	2	2	2	2	2	1	2	2	1	1		9	17	17	0	2	0
female	69	being buried	2	1	2	2	2	2	2	2	2	2	2	1	2	1	2	1	2	IX	9	43	43	0	2	0
male	56	being buried	2	1	1	2	2	2	2	2	2	2	2	1	2	2	2	1	2	VII	18	38	43	0	2	1
female	72	being buried	1	1	2	2	2	2	2	2	2	2	2	1	2	2	1	2	2	XI	12	13	17	0	2	0
male	66	being accidentally struck	1	1	2	2	1	2	2	2	2	2	2	1	2	2	2	2	2	IX	22	34	43	0	2	1
male	35	being accidentally struck	1	1	2	2	2	2	2	2	2	2	2	1	2	2	2	2	2	VII	13	25	34	0	2	0
female	18	being accidentally struck	1	1	1	2	2	2	2	2	2	2	2	1	2	1	1	2	2		17	22	27	0	2	0
male	27	being accidentally struck	1	2	2	2	2	2	2	2	2	2	2	1	1	2	1	2	1	XI	5	14	14	0	2	0
male	49	being accidentally struck	1	1	2	2	1	2	2	2	2	2	2	2	2	2	2	1	1		22	14	22	0	2	0
female	63	being accidentally struck	1	2	2	2	2	2	2	2	2	2	2	2	2	2	2	1	1	IX	4	12	12	0	2	0
female	23	being accidentally struck	1	2	2	1	2	2	2	2	1	2	2	2	2	2	1	2	2	IX	5	4	5	0	2	1
male	70	being accidentally struck	1	1	2	1	2	1	2	2	2	2	2	1	2	2	1	1	1		17	17	17	0	2	0
male	75	being accidentally struck	1	1	2	1	2	2	2	2	2	2	2	2	2	2	2	2	2		18	9	18	0	2	0
male	62	being accidentally struck	1	1	1	2	2	2	2	2	2	2	2	2	2	2	2	1	1	VIII	13	14	17	0	2	1
male	40	being accidentally struck	1	1	1	2	2	2	2	2	2	2	2	2	2	2	2	1	2	XI	17	17	17	0	2	1
female	56	being accidentally struck	1	1	2	1	2	2	2	2	2	2	2	2	2	2	2	1	2	VII	32	20	36	0	2	1
male	43	being accidentally struck	1	1	1	2	2	2	2	2	2	2	2	2	2	2	2	2	1		22	10	22	0	2	1
male	37	being accidentally struck	1	2	2	2	2	2	2	2	2	2	2	2	2	2	2	2	1		9	10	10	0	2	0
male	54	being accidentally struck	1	2	2	2	2	2	2	2	2	2	2	2	2	2	2	2	2		4	4	4	0	2	0
male	36	falling	2	2	2	2	2	2	2	2	2	2	2	2	2	2	2	2	1	XI	1	1	1	0	2	0
male	13	falling	1	1	2	2	1	2	2	2	2	2	2	1	2	2	2	2	1		18	14	22	0	2	1
female	72	being accidentally struck	1	1	2	1	2	2	2	2	2	2	2	2	2	2	1	1	2		5	12	12	0	2	0
female	58	being accidentally struck	2	1	2	2	2	2	2	2	2	2	2	2	2	2	2	2	1		9	10	10	0	2	0
male	16	being accidentally struck	2	1	2	2	2	2	2	2	2	2	2	2	2	2	2	1	1		1	4	4	0	2	0
male	37	being accidentally struck	1	1	1	2	2	2	2	2	2	2	2	2	2	2	2	2	2		13	9	13	0	2	1
male	67	falling	1	2	2	2	1	2	2	2	2	2	2	2	2	2	2	2	2	IX	18	9	18	0	2	1
male	55	being accidentally struck	1	1	2	1	2	2	2	2	2	2	2	2	2	2	2	2	2		13	9	13	0	2	0
male	48	being accidentally struck	1	2	2	2	2	2	2	2	2	2	2	2	2	2	2	2	1		1	2	2	0	2	0
male	41	being accidentally struck	2	1	2	2	2	2	2	2	2	2	2	2	2	2	2	2	1		1	1	1	0	2	0
male	59	being accidentally struck	1	1	2	2	1	2	2	2	2	2	2	2	2	2	2	1	2		22	13	22	0	2	1
female	17	being accidentally struck	1	2	2	1	2	2	2	2	2	2	2	2	1	1	1	1	2		12	12	12	0	2	1
female	60	being accidentally struck	1	1	2	2	2	2	2	2	2	2	2	2	2	2	2	1	1		13	14	17	0	2	0
male	37	falling	1	2	2	1	2	2	2	2	2	2	2	2	2	2	2	1	2		13	13	17	0	2	0
female	52	being accidentally struck	1	2	2	2	2	2	2	2	2	2	2	2	2	2	2	2	1		1	2	2	0	2	0
male	44	being accidentally struck	1	2	2	2	2	2	2	2	2	2	2	2	2	2	1	1	2	VII	13	13	17	0	2	0
female	35	being accidentally struck	1	1	2	1	2	2	2	2	2	2	2	2	2	2	2	1	1	IX	29	21	29	0	2	1
female	31	being accidentally struck	1	1	2	2	1	2	2	2	2	2	2	2	2	2	2	1	2	XI	13	17	17	0	2	0
female	71	being accidentally struck	1	1	2	2	2	2	2	2	2	2	2	2	2	2	2	2	1		4	5	5	0	2	0
female	36	being accidentally struck	1	2	1	2	2	2	2	2	2	2	2	2	2	2	2	2	1		8	5	9	0	2	0
female	53	being accidentally struck	1	1	2	2	2	2	1	2	2	2	2	2	1	2	2	1	1		17	29	29	0	2	1
male	42	being accidentally struck	1	1	2	2	1	2	2	2	2	2	2	2	2	1	2	2	2	IX	22	18	27	0	2	1
female	72	being accidentally struck	1	1	2	1	2	2	2	2	2	2	2	2	2	2	2	2	1	VII	18	10	19	0	2	1
male	57	being accidentally struck	1	2	2	1	2	2	2	2	2	2	2	2	2	1	2	1	2		18	22	27	0	2	1
female	69	being accidentally struck	1	1	2	2	1	2	2	2	2	2	2	2	2	2	1	1	1		22	14	22	0	2	0
male	23	being accidentally struck	1	2	2	2	2	2	2	2	2	2	2	2	2	2	1	2	2		9	13	13	0	2	0
female	73	being accidentally struck	1	2	2	2	2	2	2	2	2	2	2	2	2	2	2	1	2		9	13	13	0	2	0
male	54	being accidentally struck	1	1	1	2	2	2	2	2	2	2	2	2	2	2	2	1	1	VIII	17	14	17	0	2	0
female	75	falling	1	2	2	2	1	2	2	2	2	2	2	2	2	2	2	2	2	VII	13	9	13	0	2	1
male	63	being accidentally struck	1	2	2	2	2	2	2	2	2	2	2	2	2	1	1	2	2		13	13	17	0	2	0
male	70	being accidentally struck	1	2	2	2	1	2	2	2	2	2	2	2	2	2	2	1	1	VII	25	21	29	0	2	0
male	35	being accidentally struck	1	1	2	2	2	2	2	2	2	2	2	2	2	2	2	2	1	XI	13	10	14	0	2	0
female	80	being accidentally struck	1	1	2	1	2	2	2	2	2	2	2	2	1	2	2	2	1	IX	18	11	19	0	2	1
female	36	being accidentally struck	1	2	1	2	2	2	2	2	2	2	2	2	2	2	2	2	1	VI	13	10	14	0	2	0
male	54	being accidentally struck	1	2	1	2	2	2	2	2	2	2	2	2	2	2	2	2	2	XI	24	16	24	0	2	0
female	79	explosive injury	2	1	2	2	1	2	2	2	2	2	2	2	2	2	2	2	2	IX	9	9	9	0	2	1
male	88	being accidentally struck	1	2	2	2	2	2	2	2	2	2	2	2	2	1	2	2	2		13	13	17	0	2	0
female	53	being accidentally struck	1	1	2	2	1	2	2	2	2	2	2	2	2	2	2	2	2		22	9	22	0	2	1
male	45	being accidentally struck	1	1	2	2	2	2	2	2	2	2	2	2	2	2	1	1	1	IX	34	38	43	0	2	0
female	55	falling	1	1	2	2	2	2	2	2	2	2	2	2	2	2	2	2	2		5	4	5	0	2	1
male	19	being accidentally struck	1	1	2	2	1	1	2	2	2	2	2	2	2	1	2	1	2	IX	22	17	17	0	2	1
female	77	being accidentally struck	1	1	2	2	1	2	2	2	2	2	2	2	2	1	2	1	2	IX	22	22	27	0	2	0
male	46	being accidentally struck	1	1	2	1	2	2	2	2	2	2	2	2	2	2	2	1	2	VII	20	20	24	0	2	0
male	80	being accidentally struck	1	2	2	2	2	2	2	2	2	2	2	2	2	1	2	2	2	IX	9	18	18	0	2	0
male	57	being accidentally struck	2	2	1	2	2	2	2	2	2	2	2	2	2	2	2	2	2		4	4	4	0	2	1
male	63	being accidentally struck	1	2	2	2	1	2	2	2	2	2	2	2	2	2	1	1	2	IX	8	12	12	0	2	1
male	39	being accidentally struck	1	1	2	2	1	2	2	2	2	2	2	2	2	2	2	1	2	VII	13	13	17	0	2	1
male	55	being accidentally struck	1	1	2	2	2	2	2	2	2	2	2	2	2	2	2	1	2		18	20	24	0	2	0
male	56	being accidentally struck	1	1	2	2	1	2	2	2	2	2	2	2	2	2	2	2	2	IX	13	9	13	0	2	1
male	45	being accidentally struck	1	2	1	2	2	2	2	2	2	2	2	2	2	2	2	2	2		8	4	8	0	2	1
female	88	being accidentally struck	1	1	2	2	2	2	2	2	2	2	2	2	2	2	2	2	2	IX	18	9	18	0	2	0
male	41	being accidentally struck	1	1	2	2	1	2	2	2	2	2	2	1	2	2	2	2	2	XI	22	25	34	0	2	1
female	37	being accidentally struck	1	1	2	1	2	2	2	2	2	2	2	2	2	2	2	2	1		13	10	14	0	2	0

## Sheet: Lushan Earthquake
Sex	Age（year）	Injury mechanism	Fracture of ribs	Pulmonary contusion(yes=1,no=2)	Pneumothorax(yes=1,no=2)	Hemothorax(yes=1,no=2)	Hemopneumothorax(yes=1,no=2)	Fracture of sternum(yes=1,no=2)	Diaphragmatic hernia(yes=1,no=2)	Thoracic duct injury(yes=1,no=2)	Traumatic asphyxia(yes=1,no=2)	Mediastinal emphysema(yes=1,no=2)	Mediastinal effusion(yes=1,no=2)	Brain and skull(yes=1,no=2)	Face and neck(yes=1,no=2)	Abdomen(yes=1,no=2)	Spine and spinal cord(yes=1,no=2)	Extremities(yes=1,no=2)	External injuries(yes=1,no=2)	Seismic intensity	CII	ISS	NISS	Respiratory failure(yes=1, no=0)	Death（yes=1,no=2）	Thoracic procedures(yes=1,no=0)
male	31	falling	1	1	2	2	2	2	2	2	2	2	2	2	2	2	1	2	2	VIII	18	13	22	0	2	0
male	44	being accidentally struck	1	1	2	2	2	2	2	2	2	2	2	2	2	2	1	1	1	VIII	29	29	34	0	2	0
female	40	being accidentally struck	1	1	2	2	1	2	2	2	2	2	2	2	2	1	1	2	2	VII	41	20	41	0	2	1
male	55	being accidentally struck	1	1	2	2	1	1	2	2	2	2	2	2	2	2	1	2	2	VIII	27	13	27	0	2	1
male	48	being accidentally struck	1	2	2	2	2	2	2	2	2	2	2	2	2	2	2	2	1	VIII	1	2	2	0	2	0
male	57	falling	1	1	2	2	1	1	2	2	2	1	2	1	2	1	1	2	2	VI	27	22	27	0	2	0
male	84	falling	1	1	2	2	2	2	2	2	2	2	2	2	2	2	2	2	1	VI	18	10	19	0	2	0
male	46	being accidentally struck	1	1	2	2	2	2	2	2	2	2	2	2	2	1	1	2	2	VI	22	13	22	0	2	0
male	43	being accidentally struck	1	1	2	2	2	2	2	2	2	2	2	2	2	2	1	1	2	V	36	24	36	0	2	1
male	71	falling	1	1	1	2	2	2	2	2	2	2	2	2	1	1	2	2	1	VII	29	21	29	1	2	1
male	69	being accidentally struck	1	1	2	1	1	2	2	2	2	2	2	2	2	2	2	1	2	IX	19	13	22	0	2	1
male	62	being accidentally struck	1	2	2	2	2	2	2	2	2	2	2	2	2	1	1	1	2	VI	9	22	22	1	2	1
male	36	falling	2	1	2	2	2	2	2	2	2	2	2	1	2	2	1	2	2	VI	9	22	22	0	2	0
female	31	falling	2	1	2	2	2	2	2	2	2	2	2	2	2	2	1	2	2	V	9	13	13	0	2	0
female	39	being accidentally struck	1	1	2	2	2	2	2	2	2	2	2	1	2	2	1	1	2	VII	10	29	34	1	2	0
male	38	being accidentally struck	2	1	2	2	2	2	2	2	2	2	2	1	2	2	2	1	1	VIII	9	27	27	0	2	0
male	24	falling	1	2	2	2	2	2	2	2	2	2	2	2	2	1	1	1	2	VIII	1	21	24	0	2	0
male	45	falling	2	1	2	2	2	2	2	2	2	2	2	2	2	2	1	1	2	IX	9	29	29	0	2	0
male	50	being accidentally struck	1	1	2	2	2	2	2	2	2	2	2	2	2	2	1	1	1	V	22	22	27	0	2	1
female	43	being accidentally struck	2	1	2	2	1	2	2	2	2	2	2	2	2	2	2	1	1	VIII	19	25	34	1	2	1
male	31	falling	1	2	2	2	2	2	2	2	2	2	2	2	2	2	1	2	2	VII	13	13	17	0	2	0
male	43	being accidentally struck	1	1	2	2	2	2	2	2	2	2	2	1	1	2	2	2	2	VII	25	29	34	1	2	0
male	84	being accidentally struck	1	1	2	2	2	2	2	2	2	2	2	1	2	1	1	2	1	VII	22	19	27	1	2	0
male	36	falling	1	1	2	2	2	1	2	2	2	2	2	2	2	2	2	1	2	VII	22	18	27	1	2	0
female	45	being accidentally struck	1	1	2	2	2	1	2	2	2	2	2	1	1	1	1	1	1	VII	22	17	22	1	2	1
male	42	being accidentally struck	2	1	2	2	2	2	2	2	2	2	2	1	2	2	2	2	1	VIII	9	19	22	0	2	0
female	32	falling	2	1	2	2	2	2	2	2	2	2	2	2	1	2	1	1	2	VII	9	22	22	0	2	0
male	43	being accidentally struck	2	2	2	2	1	2	2	2	2	2	2	1	2	2	1	1	2	IX	9	27	27	1	2	1
female	56	being accidentally struck	2	1	2	2	2	2	2	2	2	2	2	2	2	2	1	1	2	VII	9	22	22	0	2	0
female	2	being accidentally struck	2	1	2	2	2	2	2	2	2	2	2	1	2	2	2	2	1	VII	9	26	34	0	2	0
male	9	being buried	2	1	2	2	2	2	2	2	2	2	2	2	2	1	2	2	2	IX	9	18	22	0	2	0
female	19	being accidentally struck	2	1	2	2	2	2	2	2	2	2	2	2	2	1	2	2	1	V	9	26	29	1	2	0
male	23	falling	2	1	2	2	2	2	2	2	2	2	2	2	2	1	2	1	2	V	9	29	34	1	2	0
female	50	being accidentally struck	1	2	2	2	2	2	2	2	2	2	2	1	2	2	1	2	1	VIII	22	17	22	0	2	0
female	41	being accidentally struck	1	1	2	2	1	2	2	2	2	2	2	2	2	2	2	1	1	IX	27	26	34	1	2	1
female	45	being accidentally struck	2	1	2	2	2	2	2	2	2	2	2	2	2	2	1	1	1	IX	18	13	22	0	2	0
male	53	falling	2	1	2	2	2	2	2	2	2	2	2	2	2	2	1	1	1	V	9	38	38	0	2	0
female	27	being accidentally struck	2	1	2	2	2	2	2	2	2	2	2	1	2	1	2	2	1	V	9	22	27	0	2	0
female	49	being accidentally struck	2	1	2	2	2	2	2	2	2	2	2	2	2	2	2	1	2	VIII	9	13	17	0	2	0
female	67	falling	1	1	2	2	2	2	2	2	2	2	2	2	2	2	2	1	1	VII	26	21	29	1	2	0
male	42	falling	2	1	2	2	2	1	2	2	2	2	2	1	2	2	1	2	2	VII	17	13	17	0	2	0
female	47	being accidentally struck	2	1	2	2	2	2	2	2	2	2	2	2	2	2	1	2	1	VIII	9	13	14	0	2	0
female	45	being accidentally struck	2	1	2	2	2	2	2	2	2	2	2	1	2	2	1	2	1	VIII	13	13	17	0	2	0
male	17	falling	2	2	2	2	2	1	2	2	2	2	2	2	2	2	1	2	1	IV	8	9	12	0	2	0
male	47	falling	1	1	2	2	1	2	2	2	2	1	2	1	1	2	2	1	2	VII	27	22	27	0	2	1
female	44	falling	1	1	2	2	2	1	2	2	2	2	2	2	2	2	1	2	2	V	17	25	29	0	2	0
male	33	falling	2	1	2	2	2	2	2	2	2	2	2	2	2	2	1	2	2	IV	13	25	28	0	2	0
male	19	falling	1	1	2	2	2	2	2	2	2	2	2	1	2	2	1	2	1	IV	22	29	34	0	2	0
male	60	falling	1	2	2	2	2	2	2	2	2	2	2	1	2	2	2	2	1	VII	9	19	27	0	2	0
female	82	falling	2	1	2	2	2	2	2	2	2	2	2	2	2	2	1	1	2	V	16	24	24	0	2	0
male	62	being accidentally struck	2	2	1	2	2	2	2	2	2	2	2	1	2	2	2	2	2	VII	4	29	29	1	2	1
male	25	falling	1	2	2	2	2	2	2	2	2	2	2	1	2	2	1	1	1	IV	9	34	34	0	2	0
male	77	falling	1	2	2	2	2	2	2	2	2	2	2	2	2	2	2	1	1	VII	4	14	17	0	2	0
male	59	being accidentally struck	2	1	2	2	2	2	2	2	2	2	2	1	2	2	2	2	2	IX	9	18	18	1	2	0
female	57	being accidentally struck	1	1	2	2	2	2	2	2	2	2	2	2	2	2	2	2	1	VII	18	10	19	0	2	1
male	92	being accidentally struck	1	1	2	2	2	2	2	2	2	2	2	1	2	2	1	1	1	VII	18	27	27	0	2	0
female	43	falling	2	1	2	2	2	2	2	2	2	2	2	2	2	2	1	2	2	IX	9	25	25	0	2	0
male	33	falling	2	1	2	2	2	2	2	2	2	2	2	2	2	2	1	1	2	VII	9	17	17	0	2	0
female	90	falling	1	2	2	2	2	2	2	2	2	2	2	2	2	2	2	1	1	IX	9	19	22	0	2	0
male	70	being accidentally struck	1	2	2	2	2	2	2	2	2	2	2	2	2	2	2	1	1	VII	4	14	17	0	2	0
female	78	being accidentally struck	2	1	2	2	2	2	2	2	2	2	2	2	2	2	2	1	2	VII	9	13	13	0	2	0
female	13	being accidentally struck	1	1	2	2	2	2	2	2	2	2	2	2	2	2	2	1	2	VII	13	13	17	0	2	0
female	78	burn	1	2	2	2	2	2	2	2	2	2	1	2	2	2	2	2	1	IX	13	18	22	1	2	0
male	50	falling	1	1	2	2	1	2	2	2	2	2	2	2	2	2	1	1	2	VII	27	17	27	0	2	1
male	37	being accidentally struck	2	1	2	2	2	2	2	2	2	2	2	1	2	2	2	2	2	V	16	41	57	1	2	0
male	43	falling	1	1	2	2	2	2	2	2	2	2	2	2	2	2	1	1	2	V	22	34	34	0	2	0
female	81	crush injury	2	1	2	2	2	2	2	2	2	2	2	2	2	2	2	1	2	IV	16	20	20	1	2	0
female	80	being accidentally struck	2	1	2	2	2	2	2	2	2	2	2	2	2	2	2	2	1	V	9	10	10	0	2	0
female	45	being accidentally struck	1	1	2	2	2	2	2	2	2	2	2	2	2	2	2	1	1	VIII	10	18	22	0	2	0
female	74	being accidentally struck	1	2	2	2	2	2	2	2	2	2	2	1	2	1	1	2	1	IX	13	22	22	0	2	0
male	61	falling	2	1	2	2	2	2	2	2	2	2	2	2	2	2	1	2	1	IX	13	10	14	0	2	0
female	49	being accidentally struck	2	1	2	2	2	2	2	2	2	2	2	2	2	2	2	2	2	VII	9	9	9	0	2	0
